# Supplementary material
Source: PubMed Central journal article supplement (PMC7173327)
Supplement: mmc1.pdf [file mmc1.pdf]

***Supplementary material:***

***The C-terminal portion of p33 containing the RNA-binding region is not an active RNA chaperone in vitro.***

To dissect what domains within the p33 replication protein are needed for RNA chaperone activity, first we tested p33C carrying the RPR RNA binding and the S1-S2 protein-protein interaction domains (Fig. S1A) (Panaviene, Baker, and Nagy, 2003; Rajendran and Nagy, 2004; Rajendran and Nagy, 2006). Addition of p33C to the standard p88C RdRp assay with dsDI-72 template revealed slight inhibitory effect on p88C RdRp activity (Fig. S1B), instead of the expected stimulatory effect. P33C also strongly inhibited p88C RdRp activity on dsDI-72(5'Δ69) template (Fig. S1C). Based on these observations, we suggest that p33C does not have an RNA chaperone activity comparable with the full-length p33.

***The N-terminal portion of p33 contains an additional RNA-binding region required for RNA chaperone activity.***

The lack of RNA chaperone activity by p33C indicated that the N-terminal region in p33 might also have an RNA binding region that is necessary for RNA chaperone activity. Therefore, we tested if the N-terminal segment of p33 could bind to the viral RNA in a gel mobility shift experiment. Indeed, construct p33-N1-82 carrying the N-terminal 82 aa bound to the labeled RNA template in vitro, whereas the shorter version (termed p33-N1-72 with 72aa segment) bound less efficiently (Fig. S1D). These data suggested that the N-terminal portion of p33

contains ssRNA binding activity. Further experiments have demonstrated that ssRNA-binding by p33-N1-82 is non-specific and much weaker than ssRNA binding by p33C (not shown).

To test if the N-terminal segment of p33 contributes to the RNA chaperone activity of p33, we made construct p33- $\Delta$ 72-130, which lacked the N-proximal RNA binding region (between positions 72-82) and a transmembrane segment to increase solubility of the recombinant protein in *E. coli*. When compared with the full-length p33, the purified recombinant p33- $\Delta$ 72-130 lacked RNA chaperone activity in the S1 nuclease sensitivity assay (Fig. S1E). Thus, the result with p33- $\Delta$ 72-130 is similar to that obtained with p33C, suggesting that the N-proximal RNA binding region of p33 is likely part of the functional RNA chaperone.

Figure S1.

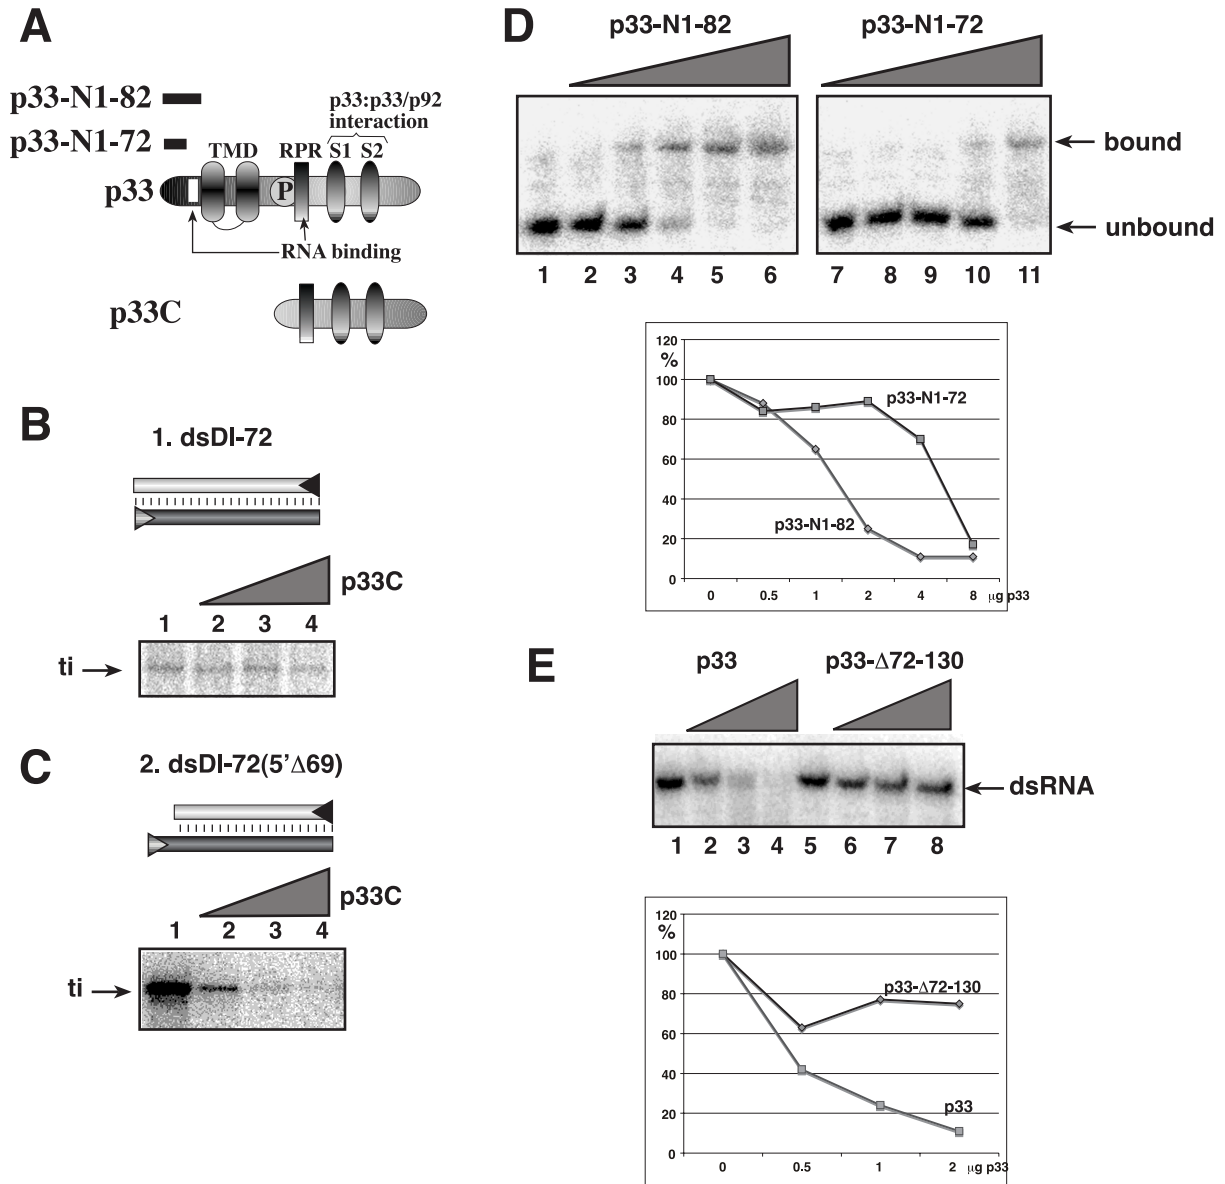

**Fig. S1.** The lack of RNA chaperone activity of p33 mutant missing the N-terminus in vitro. (A) Schematic presentation of CNV p33 and mutants with known functional domains. The only previously known function of the N-terminal sequence was its involvement in the localization of p33 to the peroxisomal membrane (including the trans-membrane domains, TMDs). The C-terminal sequence carries the Arginine-proline-rich (RPR) domain involved in RNA binding and

the S1 and S2 subdomains involved in p33:p33/p92 interaction. **(B)** Representative denaturing gels of radiolabeled RNA products synthesized by *in vitro* transcription with p88C RdRp in the presence of 0, 0.5, 1 and 2  $\mu$ g of purified recombinant p33C are shown. The samples were treated with S1 nuclease. See Fig. 5B for further details. **(D)** Gel-mobility shift assay that shows RNA binding by the truncated p33 variants. The  $^{32}$ P-labeled probe (20 ng) was used with 0, 0.5, 1, 2, 4 and 8  $\mu$ g of purified recombinant p33-N1-82 and p33-N1-72. The free RNA and the shifted band representing the RNA-protein complex are marked with arrows. The amount of free RNA left in the samples was quantified and shown as % of the total probe in the absence of protein (lanes 1 and 7). **(E)** Representative denaturing gels of  $^{32}$ P-labeled dsRI RNA template that remained after the S1 nuclease treatment in the presence of 0, 0.5, 1 and 2  $\mu$ g of purified recombinant p33 mutant lacking the second RNA binding sequence are shown. The samples were phenol/chloroform extracted and precipitated prior to gel-analysis. Note that we used a p33 mutant with increased solubility in *E. coli* due to the missing hydrophobic TMD domain.

### ***Materials and methods***

***RNA gel mobility shift assay:*** RI(-)probe of DI-72 RNA was labeled with [ $^{32}$ P]UTP using T7 RNA polymerase. Approximately 20 ng of labeled RNA was incubated with MBP-p33 mutant for 20 min at room temperature in the RdRp buffer (Rajendran and Nagy, 2003; Rajendran, Pogany, and Nagy, 2002). The samples were analyzed by electrophoresis on native 5% acrylamide gels, run at 200 V for 20 min at 4°C in Tris-acetate-EDTA (TAE) buffer. Analysis was as described above.

## REFERENCES

- Panaviene, Z., Baker, J. M., and Nagy, P. D. (2003). The overlapping RNA-binding domains of p33 and p92 replicase proteins are essential for tombusvirus replication. *Virology* **308**(1), 191-205.
- Rajendran, K. S., and Nagy, P. D. (2003). Characterization of the RNA-binding domains in the replicase proteins of tomato bushy stunt virus. *J Virol* **77**(17), 9244-58.
- Rajendran, K. S., and Nagy, P. D. (2004). Interaction between the replicase proteins of Tomato bushy stunt virus in vitro and in vivo. *Virology* **326**(2), 250-61.
- Rajendran, K. S., and Nagy, P. D. (2006). Kinetics and functional studies on interaction between the replicase proteins of Tomato Bushy Stunt Virus: requirement of p33:p92 interaction for replicase assembly. *Virology* **345**(1), 270-9.
- Rajendran, K. S., Pogany, J., and Nagy, P. D. (2002). Comparison of turnip crinkle virus RNA-dependent RNA polymerase preparations expressed in *Escherichia coli* or derived from infected plants. *J Virol* **76**(4), 1707-17.
